# Supplementary material
Source: publisher figshare collection journal article supplement (https://tandf.figshare.com/articles/dataset/_/6738224)
Supplement: Supplementary file 1 [file 1]

## Supplemental Material 1

### Low Vision Screening Questionnaire

Name of Field Worker: \_\_\_\_\_

Date & Day: \_\_\_\_\_

Village Name: \_\_\_\_\_

Time: \_\_\_\_\_

#### Low Vision Patient Details

Name: \_\_\_\_\_

Age: \_\_\_\_\_

Sex: \_\_\_\_\_

Address: \_\_\_\_\_

Contact Number: \_\_\_\_\_

1. Birth History

- ☐ Preterm    ☐ Full term

2. Birth Weight: \_\_\_\_\_

3. Milestones:

- ☐ Normal    ☐ Delayed

4. Any other medical conditions: \_\_\_\_\_

5. Vision right eye: \_\_\_\_\_ Vision left eye: \_\_\_\_\_

6. Age low vision was identified: \_\_\_\_\_

7. Cause of low vision:

- ☐ Present at birth    ☐ Disease/syndrome  
☐ Accident    ☐ Other: \_\_\_\_\_

8. Blindness Status

- ☐ Partially blind    ☐ Fully blind

9. Has patient seen an ophthalmologist?

- ☐ No  
☐ Yes- if yes vision right eye: \_\_\_\_\_ vision left eye: \_\_\_\_\_

10. Attends school

- ☐ No  
☐ Yes- if yes: ☐ normal school    ☐ integrated school    ☐ blind school

11. Socioeconomic status (annual income of parents)

- ☐ Less than Rs. 72,000  
☐ Rs. 72,000 or more

12. Family Details: \_\_\_\_\_

13. Family History of Blindness?

- ☐ No    ☐ Yes- if yes: \_\_\_\_\_

14. Photophobia?

- ☐ Yes    ☐ No

15. Night Blindness?

- ☐ Yes    ☐ No

16. Does the patient use low vision devices?

- ☐ No    ☐ Yes- if yes: \_\_\_\_\_
